# Supplementary material for: A machine learning approach for the factorization of psychometric data with application to the Delis Kaplan Executive Function System
Source: PubMed Central journal article supplement (PMC8377093; doi:10.1038/s41598-021-96342-3), 2021-08-19
Supplement: 41598_2021_96342_MOESM1_ESM.pdf [file 41598_2021_96342_MOESM1_ESM.pdf]

# Education and Occupation of Participants

## Highest Occupational Code

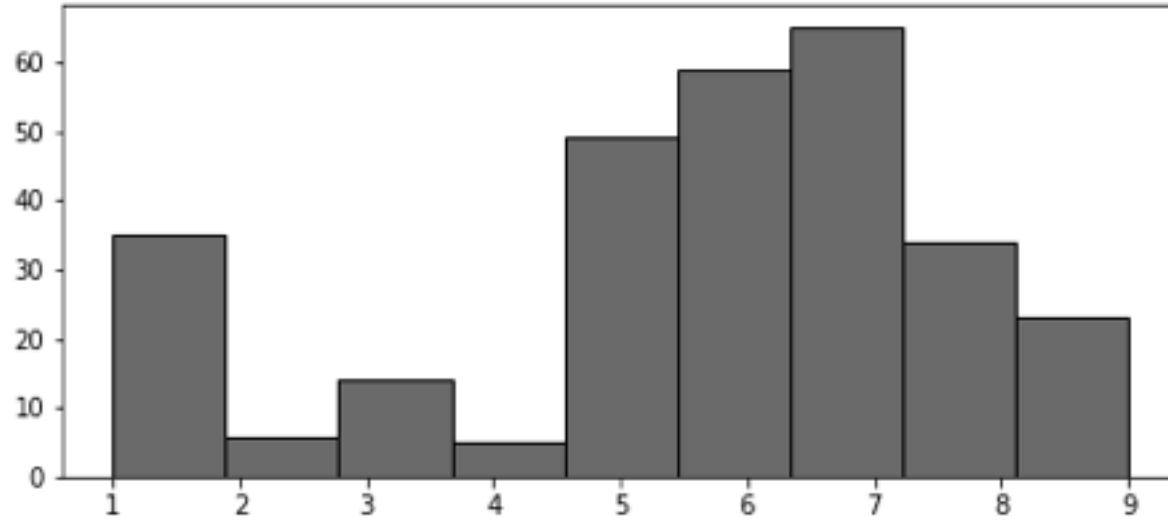

## Education Code

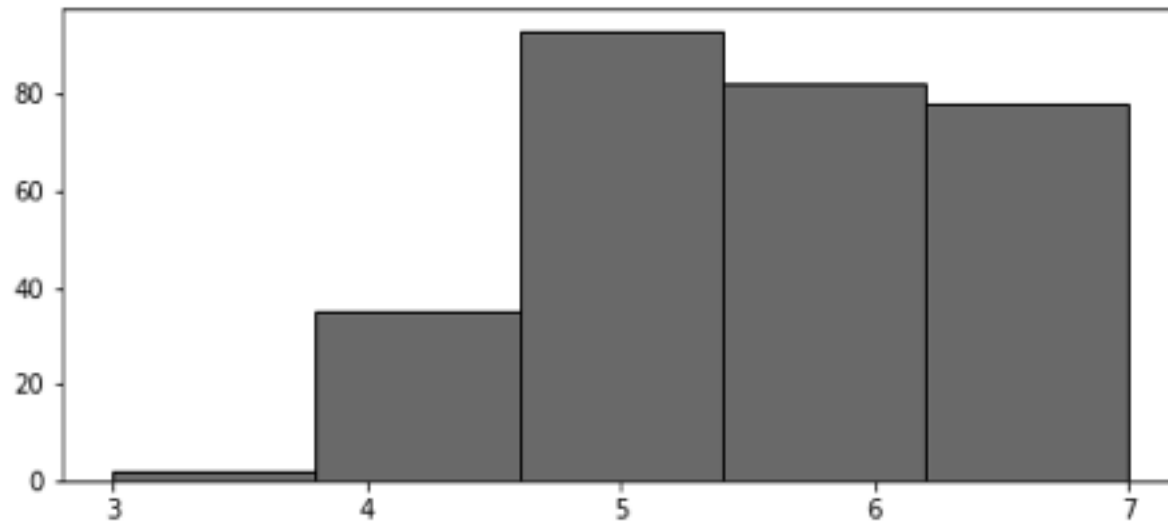

### Highest Occupational Code

- 9-Higher executive; proprietor of large businesses, major professional
- 8-Administrators, lesser professionals, proprietor of medium-sized business
- 7-Smaller business owners, farm owners, managers, minor professionals
- 6-Technicians, semi-professionals, small business owners (business valued at \$50,000-70,000)
- 5-Clerical and sales workers, small farm and business owners (business valued at \$25,000-50,000)
- 4-Smaller business owners (< \$25,000), skilled manual laborers, craftsman, tenant farmers
- 3-Machine operators and semi-skilled workers
- 2-Unskilled workers
- 1-Farm laborers, menial service workers, students, housewives (dependent on welfare, no regular occupation)

### Education Code

- 7-Graduate/professional training (graduate degree)
- 6-Standard college or university graduation
- 5-Partial college (at least one year or specialized training)
- 4-High school graduate
- 3-Partial high school (10th or 11th grade)
- 2-Junior high school (including 9th grade)
- 1-Less than seventh grade
