# Supplementary material for: A machine learning approach for the factorization of psychometric data with application to the Delis Kaplan Executive Function System
Source: PubMed Central journal article supplement (PMC8377093; doi:10.1038/s41598-021-96342-3), 2021-08-19
Supplement: 41598_2021_96342_MOESM3_ESM.pdf [file 41598_2021_96342_MOESM3_ESM.pdf]

# Normality Testing Results

| Variable                | D'Agostino's K <sup>2</sup> |         | Shapiro-Wilk |         |
|-------------------------|-----------------------------|---------|--------------|---------|
|                         | Statistic                   | p-value | Statistic    | p-value |
| Number-letter Switching | 55.599                      | 0.000   | 0.921        | 0.000   |
| Correct Sorting         | 1.893                       | 0.388   | 0.985        | 0.001   |
| Free Sort               | 2.917                       | 0.233   | 0.986        | 0.002   |
| Sort Recognition        | 5.133                       | 0.077   | 0.986        | 0.002   |
| CWI                     | 28.199                      | 0.000   | 0.959        | 0.000   |
| CWI Switching           | 39.532                      | 0.000   | 0.940        | 0.000   |
| Letter Fluency          | 6.987                       | 0.030   | 0.984        | 0.001   |
| Category Fluency        | 1.208                       | 0.547   | 0.982        | 0.000   |
| Category Switching      | 0.865                       | 0.649   | 0.982        | 0.000   |
| Design Fluency          | 5.626                       | 0.060   | 0.976        | 0.000   |
| Design Switching        | 3.627                       | 0.163   | 0.983        | 0.001   |
| Design Inhibition       | 0.687                       | 0.709   | 0.982        | 0.000   |
| Tower Test              | 7.734                       | 0.021   | 0.980        | 0.000   |
| Proverb Test            | 31.590                      | 0.000   | 0.942        | 0.000   |
| Word Context            | 20.971                      | 0.000   | 0.953        | 0.000   |
| Initial Abstraction     | 29.904                      | 0.000   | 0.921        | 0.000   |
| 20 Questions            | 45.501                      | 0.000   | 0.942        | 0.000   |
