# Supplementary material for: A machine learning approach for the factorization of psychometric data with application to the Delis Kaplan Executive Function System
Source: PubMed Central journal article supplement (PMC8377093; doi:10.1038/s41598-021-96342-3), 2021-08-19
Supplement: 41598_2021_96342_MOESM5_ESM.pdf [file 41598_2021_96342_MOESM5_ESM.pdf]

# Factor structure for subsample of males

Principal Component Analysis

Orthonormal projective non-negative matrix factorization

Exploratory Factor Analysis

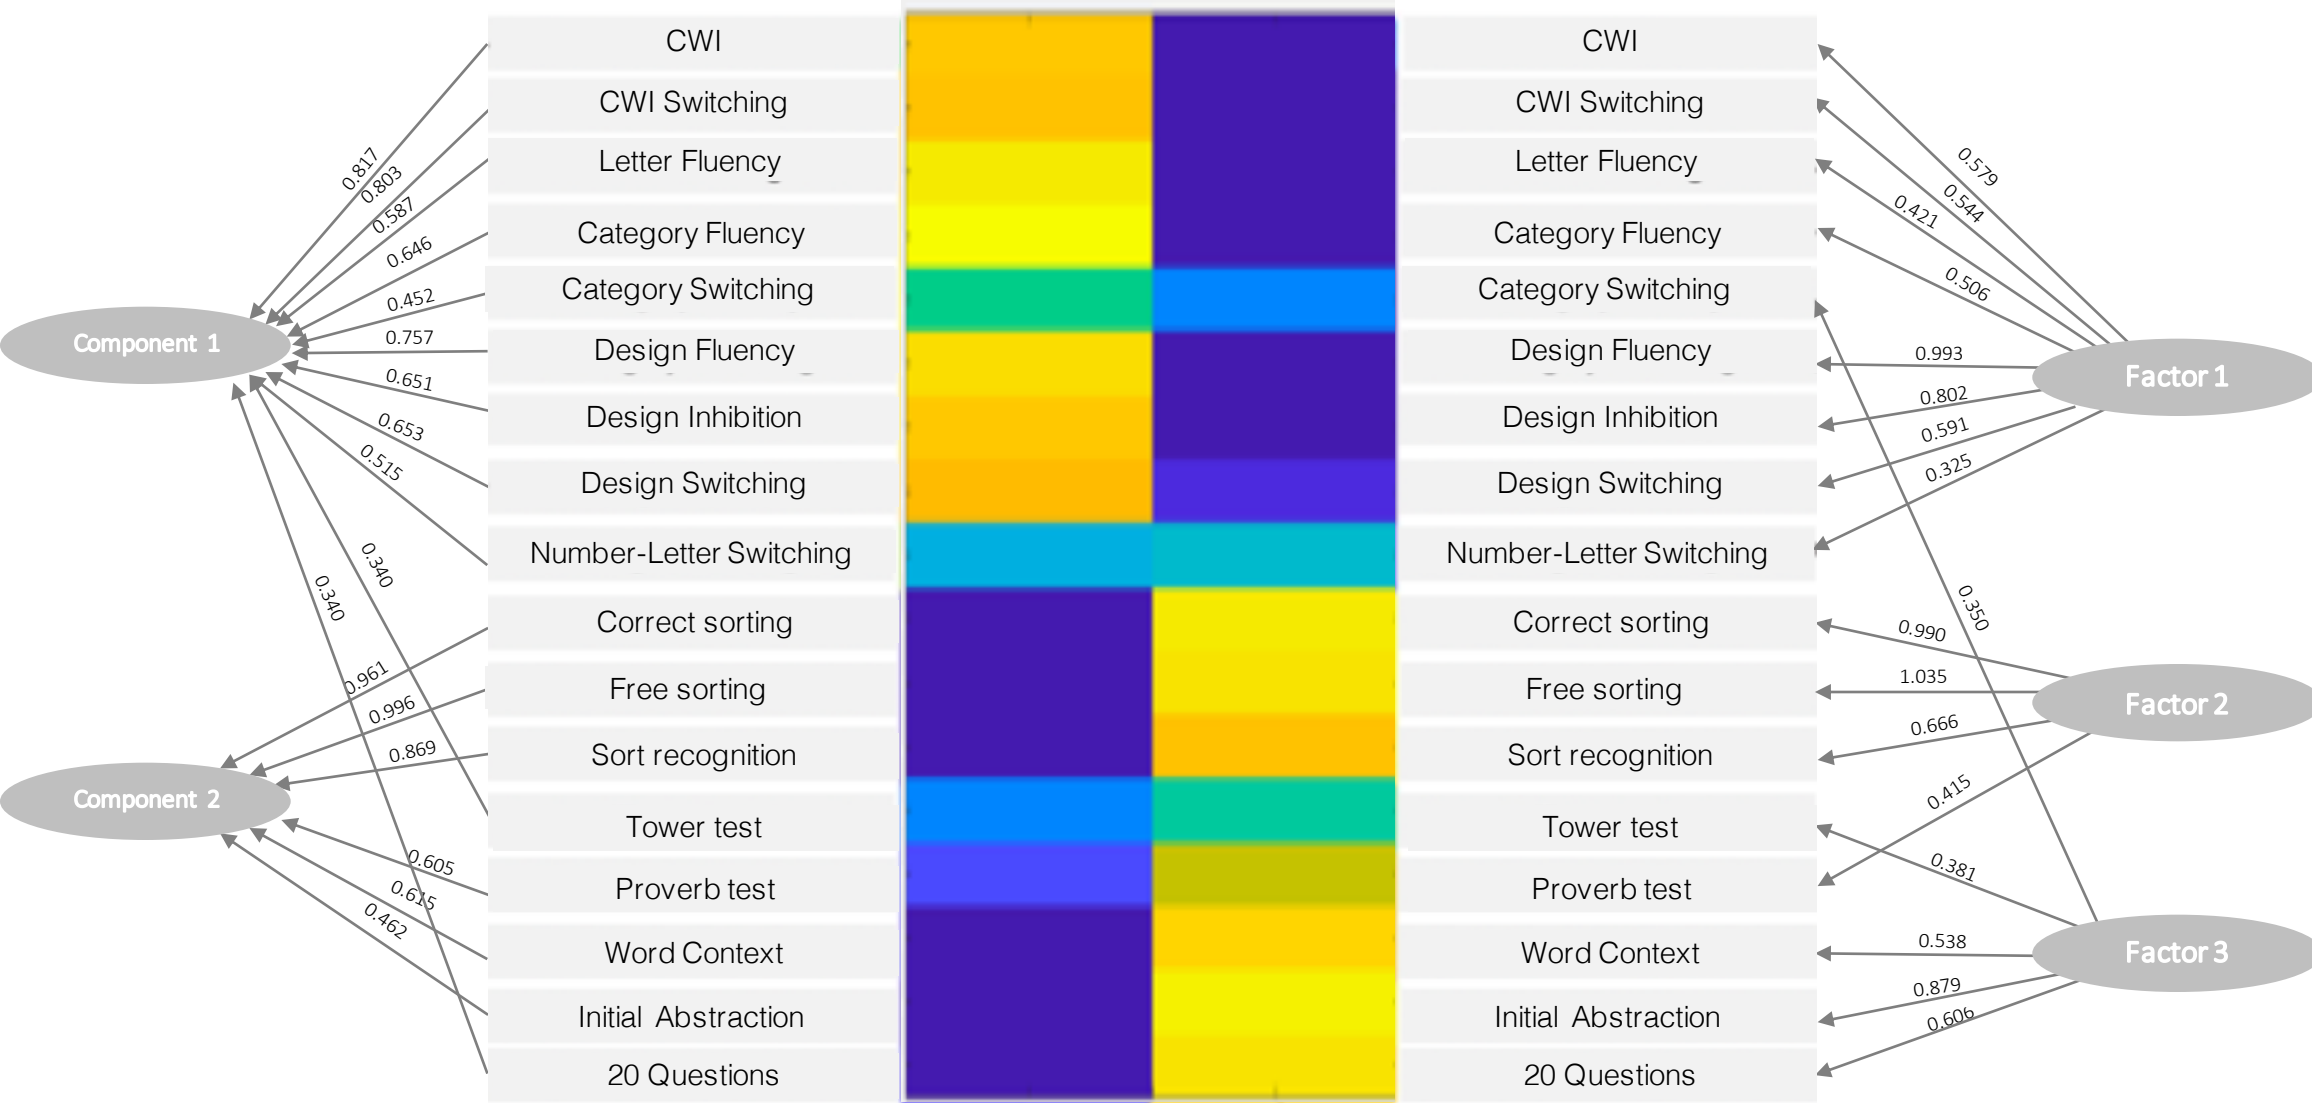

0.5 1 1.5 2 2.5
