# Supplementary material for: A machine learning approach for the factorization of psychometric data with application to the Delis Kaplan Executive Function System
Source: PubMed Central journal article supplement (PMC8377093; doi:10.1038/s41598-021-96342-3), 2021-08-19

# Stability measures for subsample of older adults

## Stability and Generalizability measures for OPNMF analysis

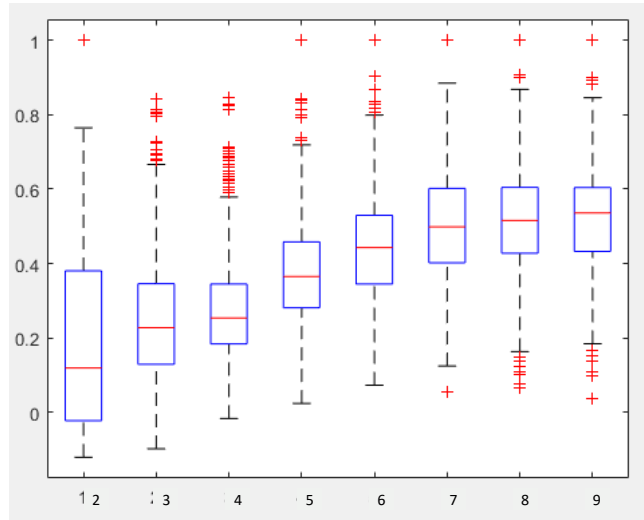

Adjusted Rand Index

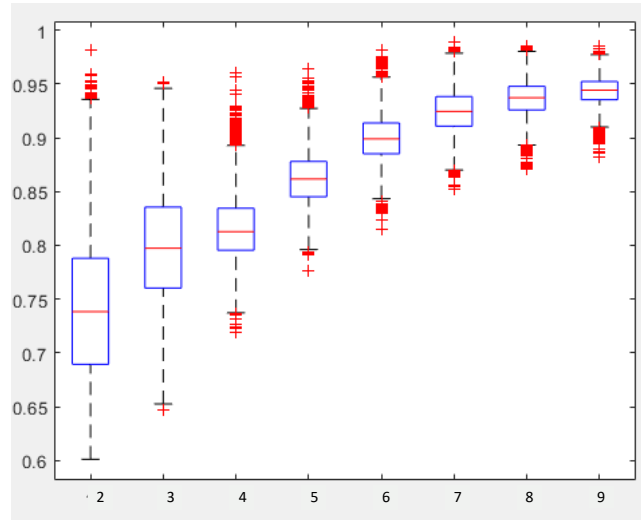

Concordance Index

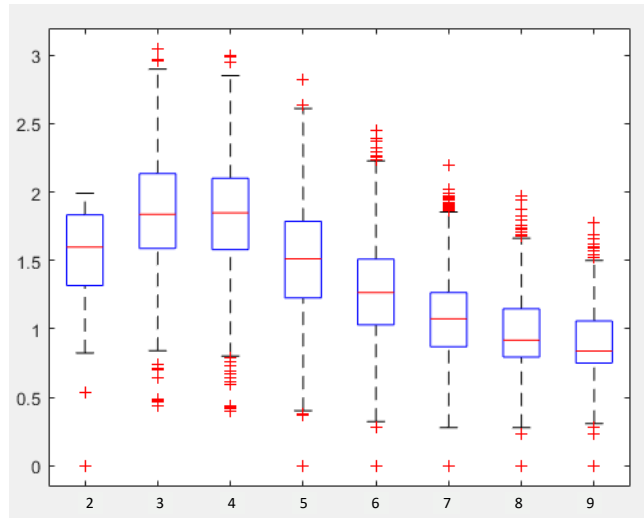

Variation of Information

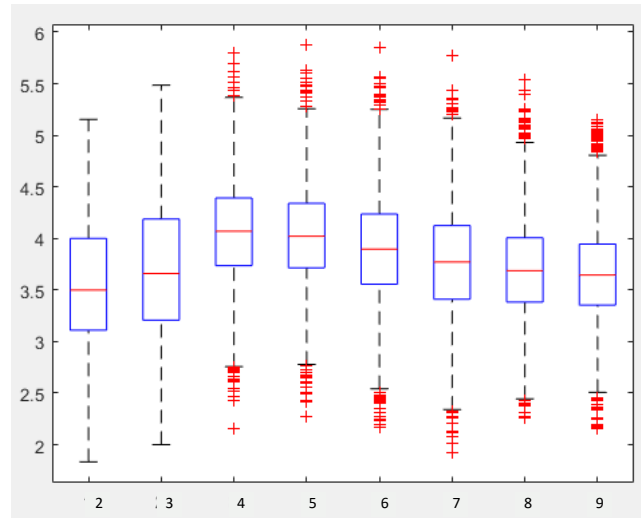

Transfer Reconstruction Error

## Parallel Analysis: PCA

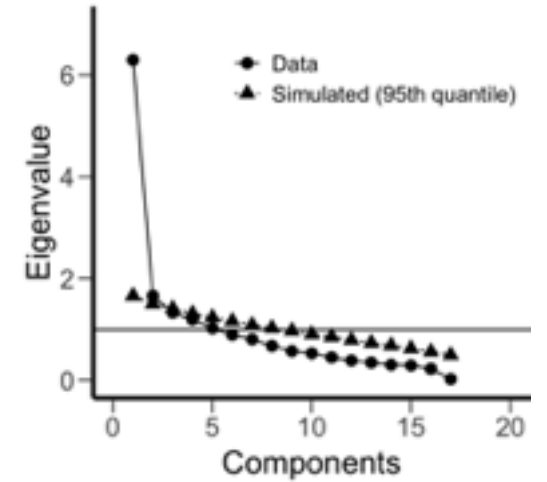

## Parallel Analysis: EFA

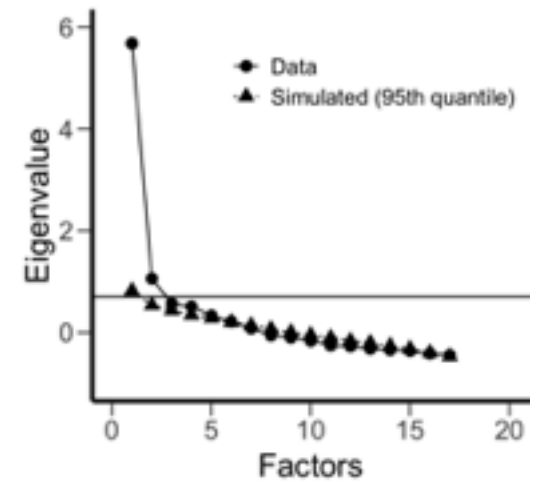

Supplement: 41598_2021_96342_MOESM8_ESM.pdf [file 41598_2021_96342_MOESM8_ESM.pdf]
